# Supplementary material for: Cut-off Lows in the South Africa region and their contribution to precipitation
Source: Springer Nature journal article supplement (doi:10.1007/s00382-012-1579-6), 2012-11-16

*Figures A and B: verification of CoL structure over the western Indian Ocean*

*Figure A1: Trajectory of a CoL in the Mozambique Channel (from the 6th to 13th of March 2010). The red star marks the generation day. In our CoL dataset, only one CoL has reached the Mozambique Channel in JFM 2010.*


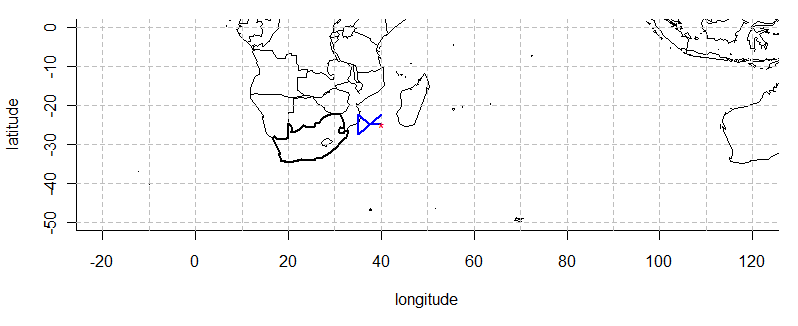


*Figure A2: Daily T500 hPa (colors, unit=K), Z500 (contours interval = 20 gpm) from the 5th to the 14th of March 2010. White dashes represent the position of the polar jet as defined in Favre et al. (2011). The date is inscribed in the top left corner of the map.*


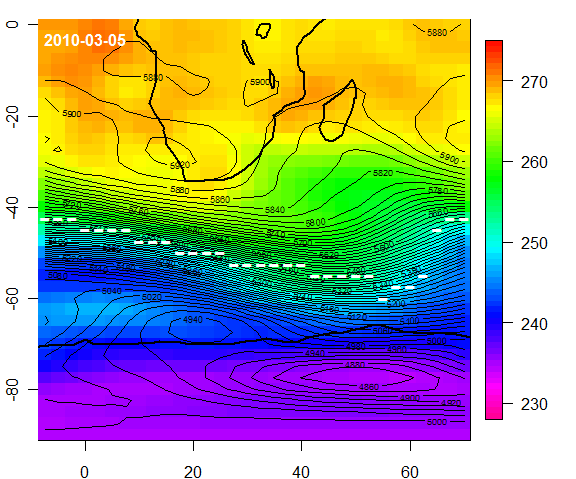

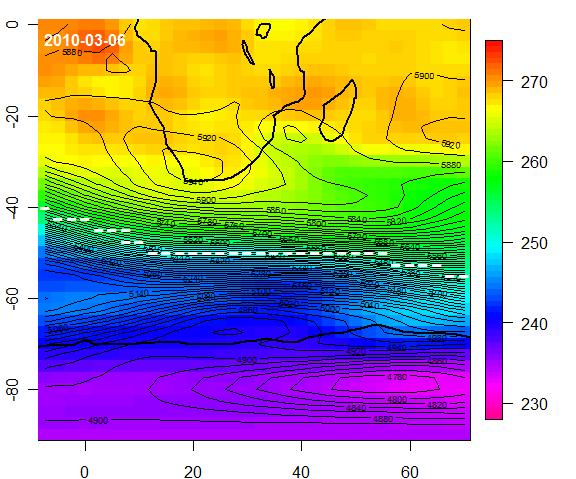

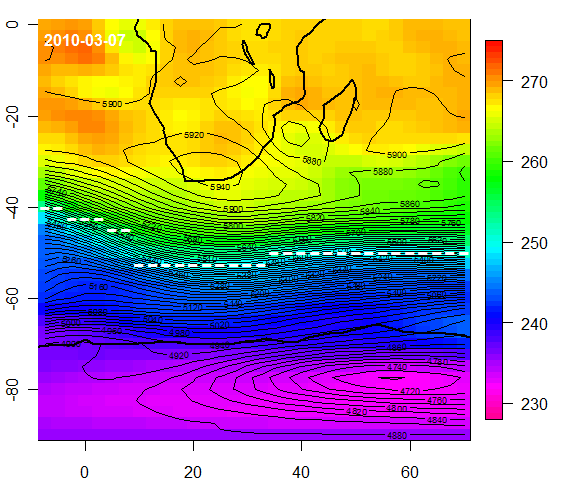

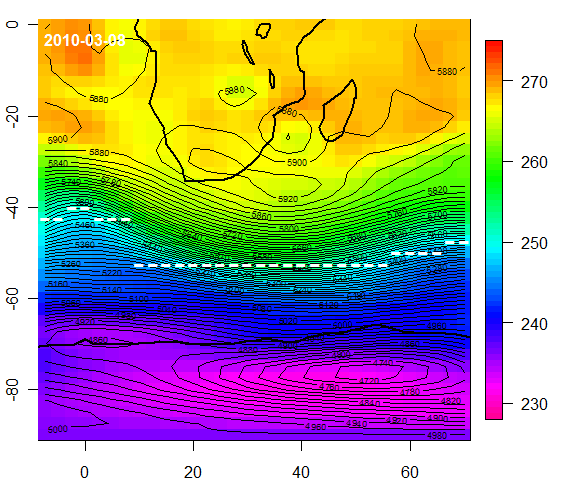

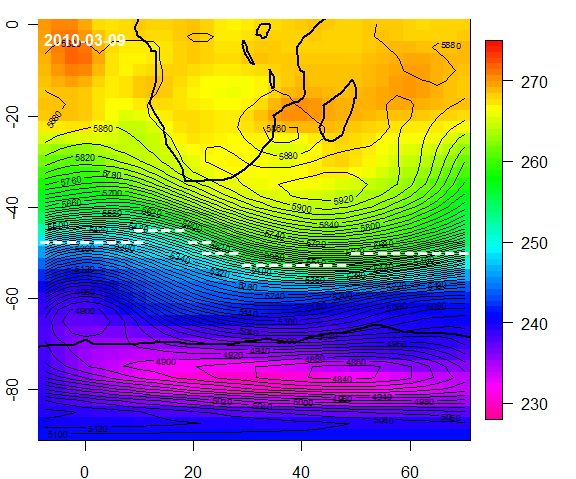

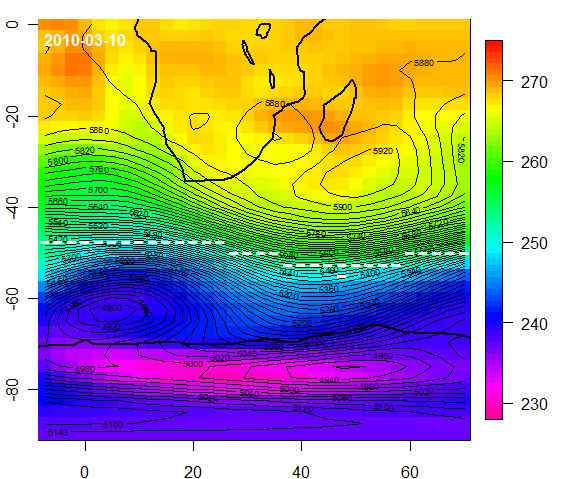

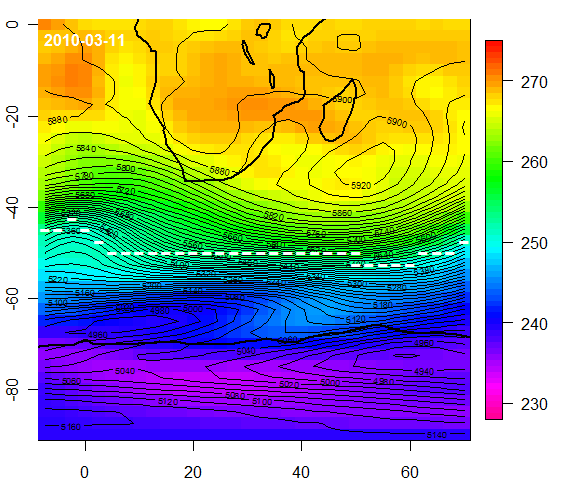

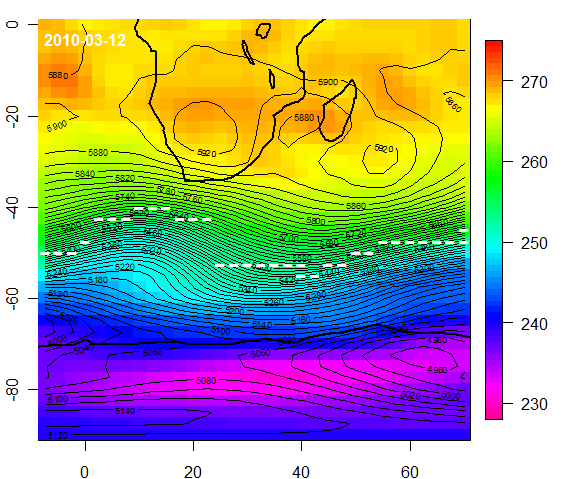

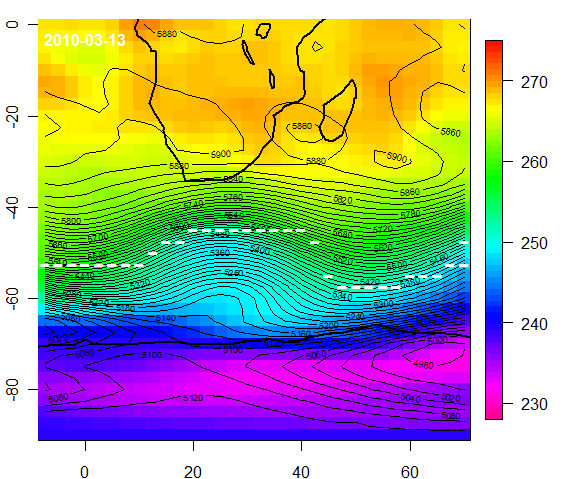

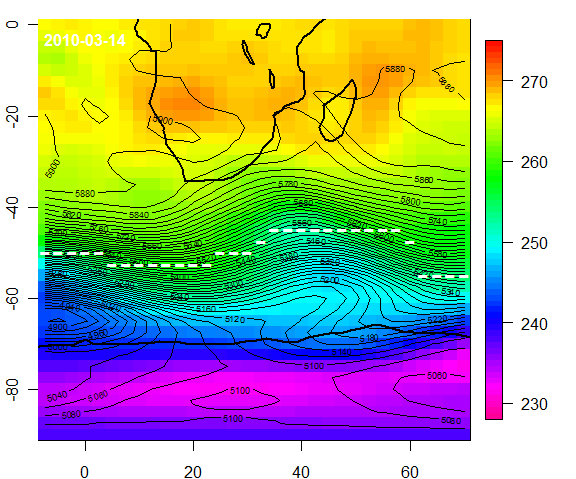


*Figure B1: Composite of T500 built from all generation days of CoLs at 22.5°S between 35°E and 45°E (Interval contour=0.5K). Number of cases = 39 over the period 1979-2010.*


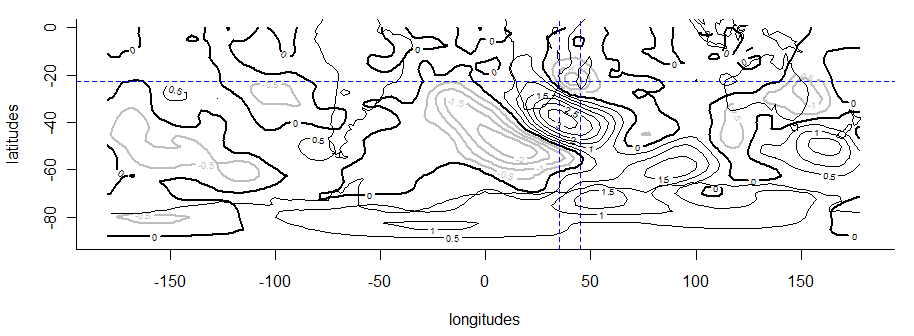


*Figure B2: Same as B1 but for generation days at 25°S between 35°E and 45°E. Number of cases = 45 over the period 1979-2010.*


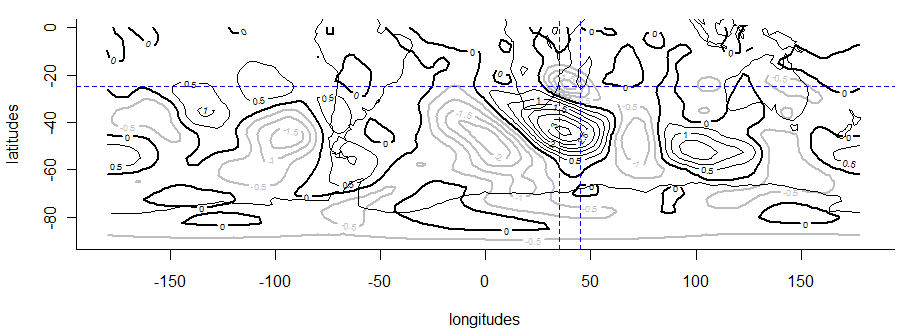


*Figure B3: Same as B1 but for generation days at 22.5°S between 55°E and 65°E. Number of cases = 15 over the period 1979-2010.*


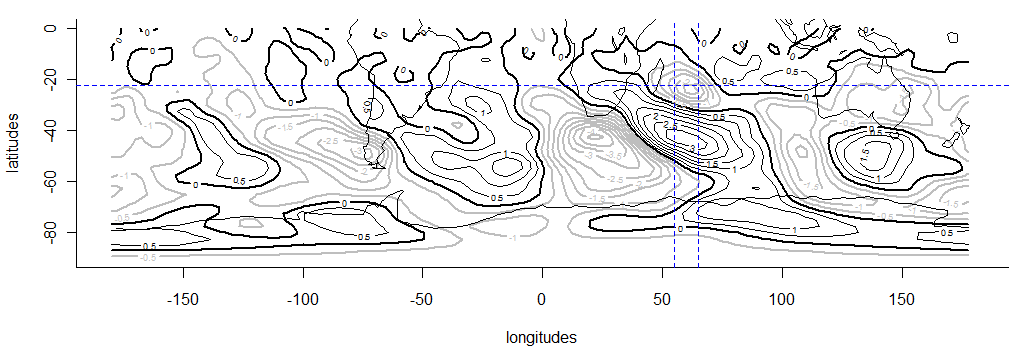


*Figure B4: Same as B1 but for generation days at 25°S between 55°E and 65°E. Number of cases = 14 over the period 1979-2010.*


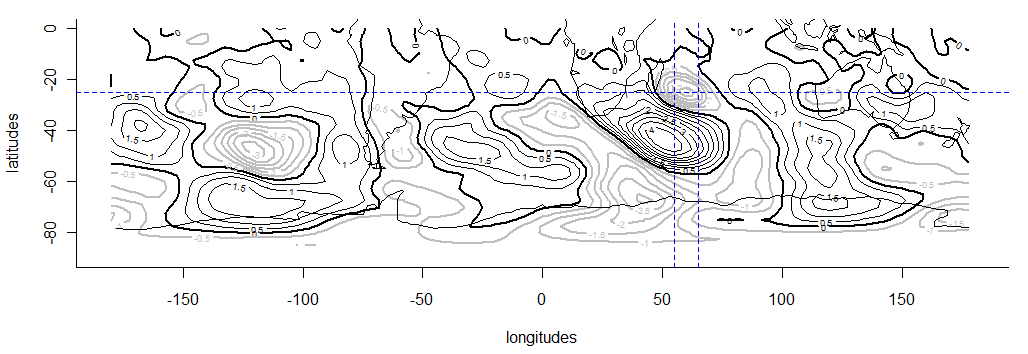


Note: *The “cold pools” and the warm ridges (cutoff highs) are properly defined on each composite.*

*Figure C1: Annual linear trend over the period 1979-2006 expressed in percent. Larger signs= sig> 90% (t-test).*

Annual - CoL total rainfall Annual - Freq rainy days Annual - Freq extremes


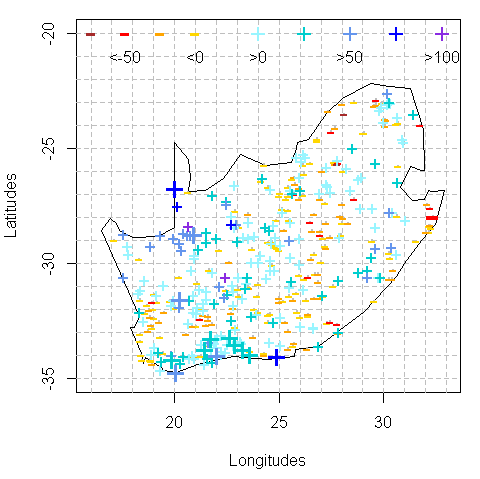

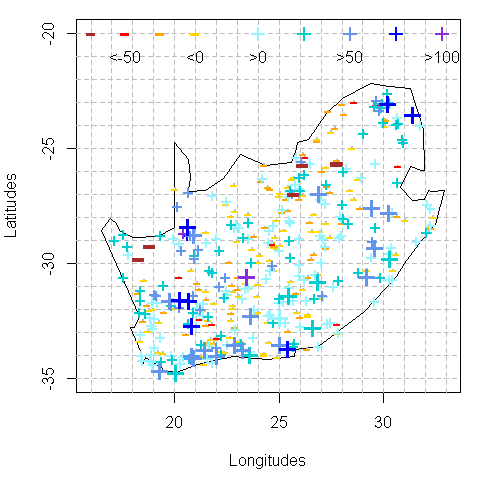

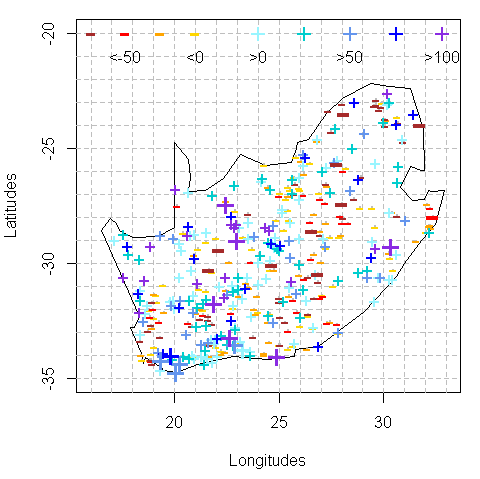


*Figure C2: Seasonal linear trends over the period 1979-2006 expressed in percent. Larger signs= sig> 90% (t-test).*

(a) JFM - Trend CoL total rainfall (b) JFM - Trend Freq rainy days (c) JFM - Trend Freq Ext rainy days


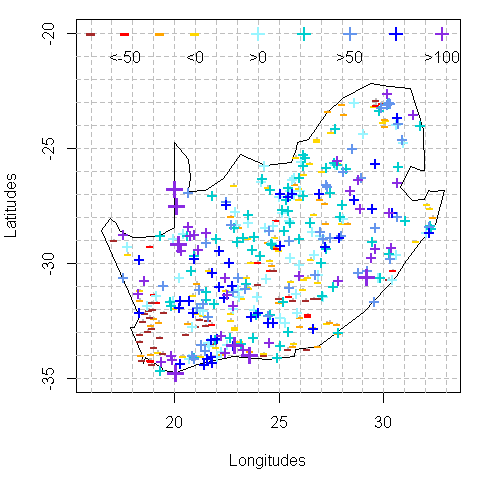

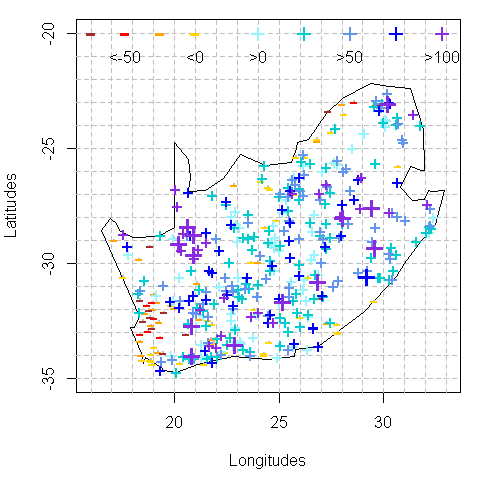

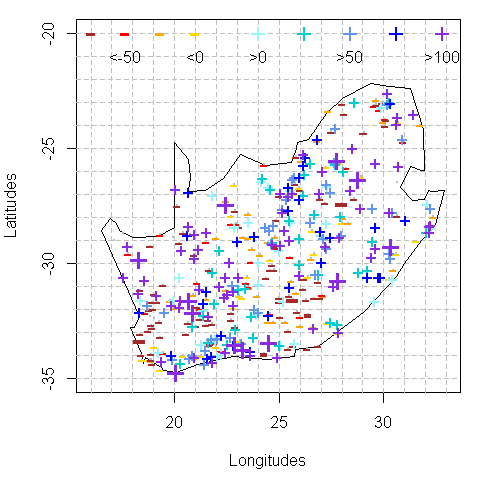


(d) AMJ - Trend CoL total rainfall (e) AMJ - Trend Freq rainy days (f) AMJ - Trend Freq Ext rainy days


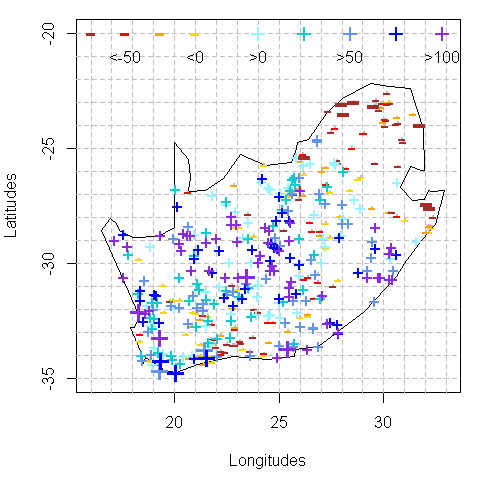

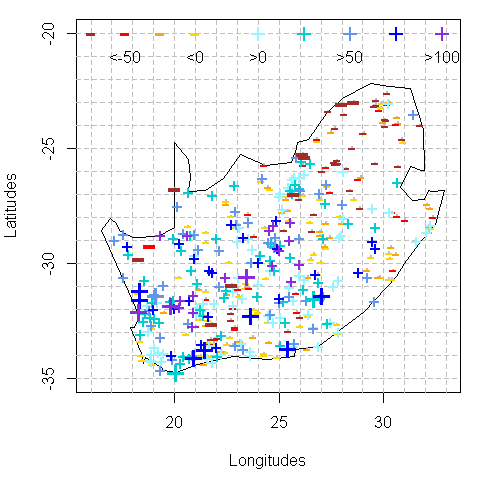

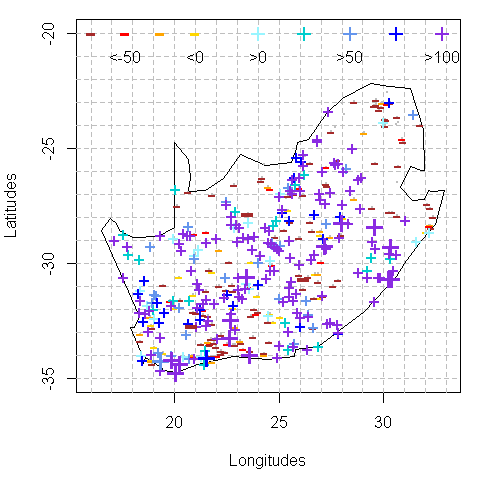


(g) JAS - Trend CoL total rainfall (h) JAS - Trend Freq rainy days (i) JAS - Trend Freq Ext rainy days


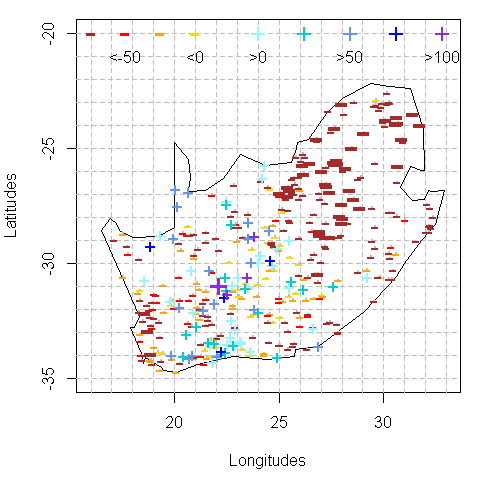

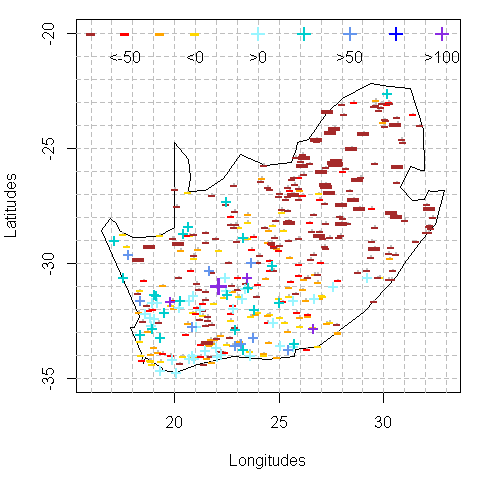

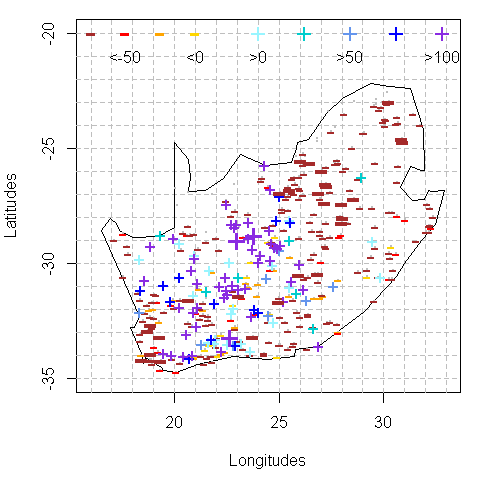


(j) OND - Trend CoL total rainfall (k) OND - Trend Freq rainy days (l) OND - Trend Freq Ext rainy days


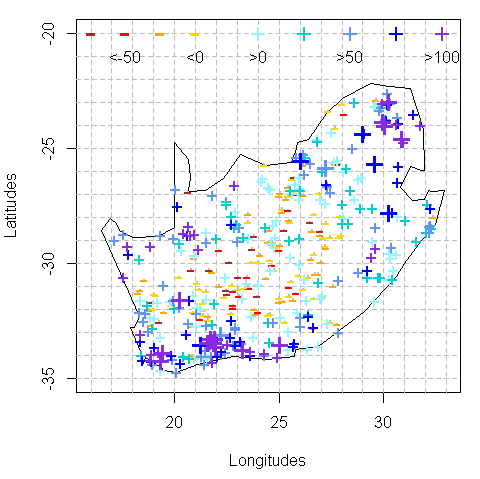

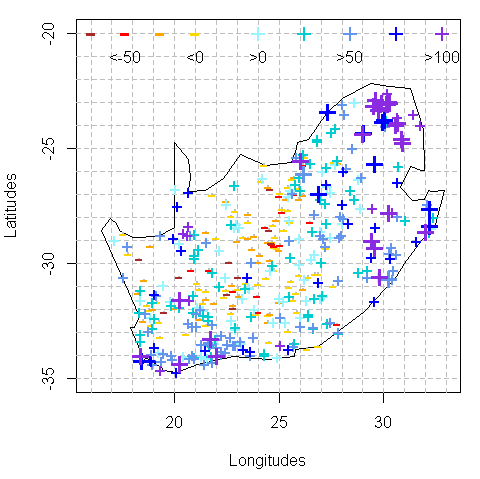

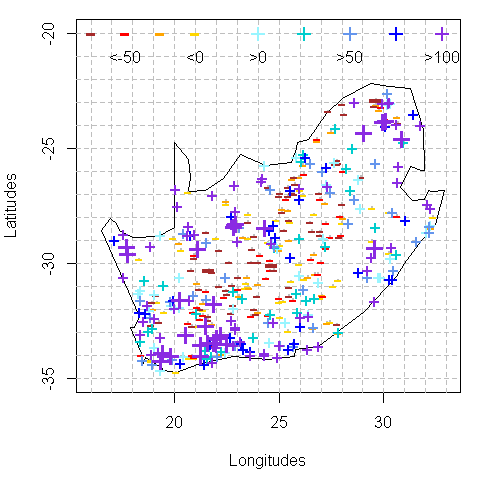

Supplement: MOESM1 [file 382_2012_1579_MOESM1_ESM.docx]
